# Supplementary material for: Regulation of aggregation-induced emission behaviours and mechanofluorochromism of tetraphenylethene through different oxidation states of sulphur moieties
Source: Royal Society of Chemistry journal article supplement (doi:10.1039/c9tc01848d), 2019-01-01
Supplement: c9tc01848d1.pdf [file c9tc01848d1.pdf]

Electronic Supplementary Information (ESI)

Regulation of aggregation-induced emission behaviours and  
mechanofluorochromism of tetraphenylethene through different oxidation  
states of sulphur moieties

*Qin Yang,<sup>a</sup> Dongyang Li,<sup>b</sup> Weijie Chi,<sup>c</sup> Ronghui Guo,<sup>a</sup> Bin Yan,<sup>a</sup> Jianwu  
Lan,<sup>\*a</sup> Xiaogang Liu<sup>\*c</sup> and Jun Yin<sup>\*b,d</sup>*

<sup>a</sup>College of Light Industry and Textile and Food Engineering, Sichuan University, Chengdu, Sichuan, 610005, China

<sup>b</sup>Key Laboratory of Pesticide and Chemical Biology, Ministry of Education, College of Chemistry, Central China Normal University, Wuhan 430079, P. R. China.

<sup>c</sup>Singapore University of Technology and Design, 8 Somapah Road, Singapore 487372. E-mail: xiaogang\_liu@sutd.edu.sg

<sup>d</sup>State Key Laboratory of Chemical Oncogenomics, Key Laboratory of Chemical Biology, the Graduate School at Shenzhen, Tsinghua University, Shenzhen, Guangdong, PR China, 518055

**Contents:**

**Fig. S1.** The UV-Vis absorption spectra **1** (A), **2** (B), and **3** (C) (10  $\mu$ M) in CH<sub>3</sub>CN-H<sub>2</sub>O mixtures with different volume fractions of water ( $f_w$ ).

**Fig. S2.** Optimized molecular structures and frontier molecular orbitals, as well as their photoexcitation data ( $f$ : oscillator strength;  $E$ : excitatio energy from the S<sub>0</sub> to the S<sub>1</sub> state;  $\lambda_{\text{abs}}$ : calculated peak UV-vis absorption wavelengths) of **1**—**3** in water.

**Fig. S3.** Optimized dimer structures of **1** and one selected dihedral angel of a phenyl ring both in the ground (S<sub>0</sub>) and the first excited singlet states (S<sub>1</sub>) in water.

**Fig. S4.** The Normalized fluorescence emission spectra ( $\lambda_{\text{ex}} = 340$  nm) of **1**, **2** and **3** in the amorphous phase.

**Fig. S5.** The intermolecular interactions in the crystals of **1** (A), **3W** (B), and **3G** (C).

**Fig. S6.** The XRD patterns (A) and PL spectra (B) of **2**.

**Fig. S7.** The PL spectra of **3G** before and after grinding. Excitation wavelength: 340 nm.

**Fig. S8.** DSC curves of **3G** and **3W**.

**Fig. S9.** Molecular structures of **3W** and **3G** as extracted from crystal structures, their frontier molecular orbitals, and photoexcitation data in water ( $f$ : oscillator strength;  $E$ : excitation energy from the  $S_0$  to the  $S_1$  state;  $\lambda_{\text{abs}}$ : calculated peak UV-vis absorption wavelengths).

**Fig S10.**  $^1\text{H}$  NMR of **1** in  $\text{CDCl}_3$ .

**Fig S11.**  $^{13}\text{C}$  NMR of **1** in  $\text{CDCl}_3$ .

**Fig S12.**  $^1\text{H}$  NMR of **2** in  $\text{CDCl}_3$ .

**Fig S13.**  $^{13}\text{C}$  NMR of **2** in  $\text{CDCl}_3$ .

**Fig S14.**  $^1\text{H}$  NMR of **3** in  $\text{CDCl}_3$ .

**Fig S15.**  $^{13}\text{C}$  NMR of **3** in  $\text{CDCl}_3$ .

**Table S1.** Crystal data and structure refinement for **1**.

**Table S2.** Crystal data and structure refinement for **3G** and **3W**.

**Table S3.** The selected torsion angles ( $^\circ$ ) among benzene rings and the plane of the ethylene within crystals of **3G** and **3W**.

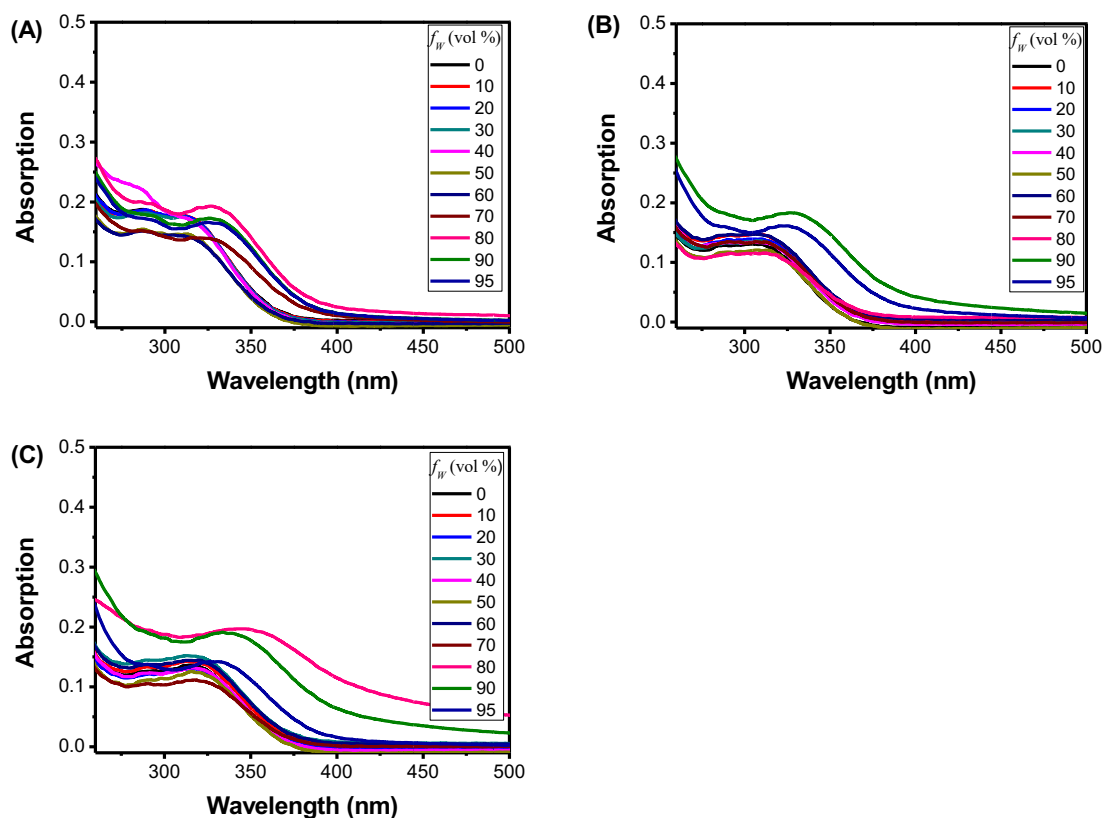

**Fig. S1.** The UV-Vis absorption spectra **1** (A), **2** (B), and **3** (C) (10  $\mu$ M) in  $\text{CH}_3\text{CN-H}_2\text{O}$  mixtures with different volume fractions of water ( $f_W$ ).

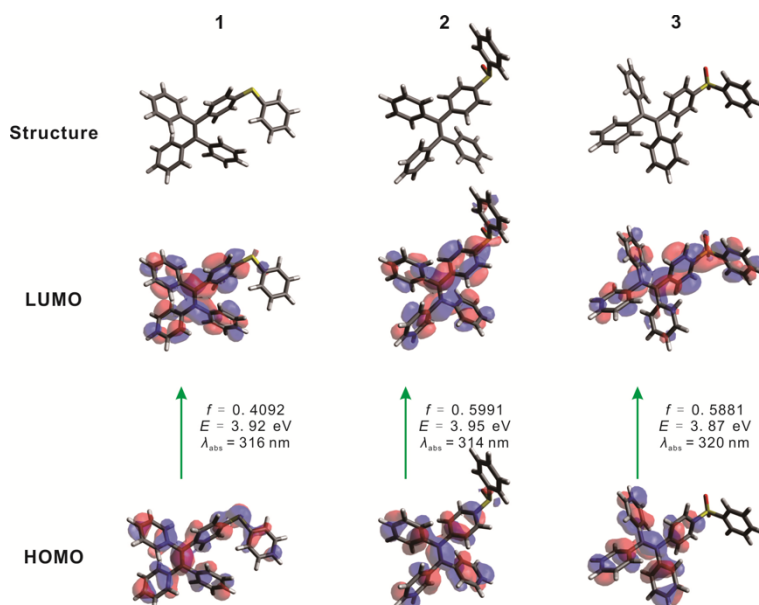

**Fig. S2.** Optimized molecular structures and frontier molecular orbitals, as well as their photoexcitation data ( $f$ : oscillator strength;  $E$ : excitation energy from the  $S_0$  to the  $S_1$  state;  $\lambda_{\text{abs}}$ : calculated peak UV-vis absorption wavelengths) of **1**–**3** in water.



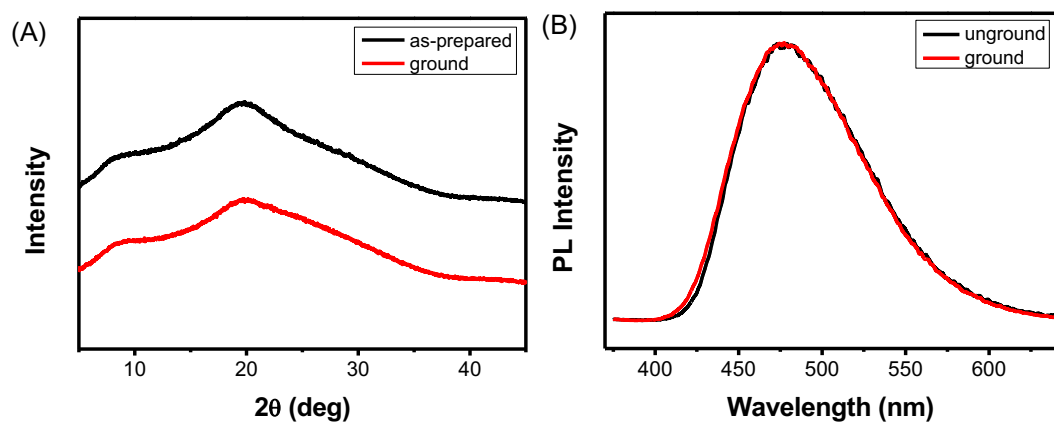

**Fig. S6.** The XRD patterns (A) and PL spectra (B) of **2**. Excitation wavelength: 340 nm.

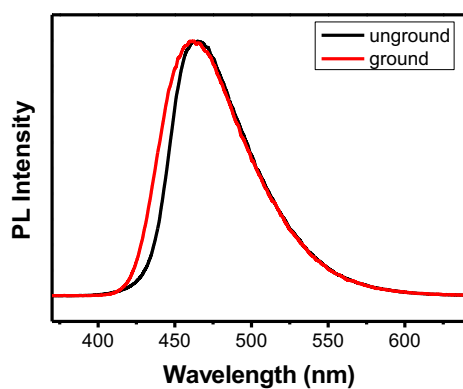

**Fig. S7.** The PL spectra of **3G** before and after grinding. Excitation wavelength: 340 nm.

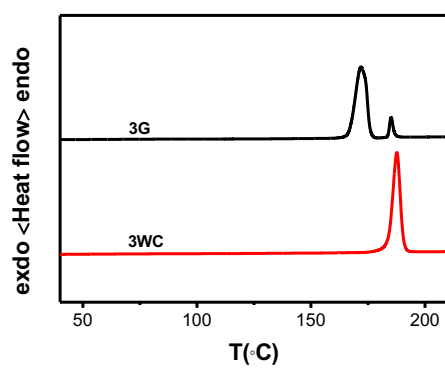

**Fig. S8.** DSC curves of **3G** and **3W**.

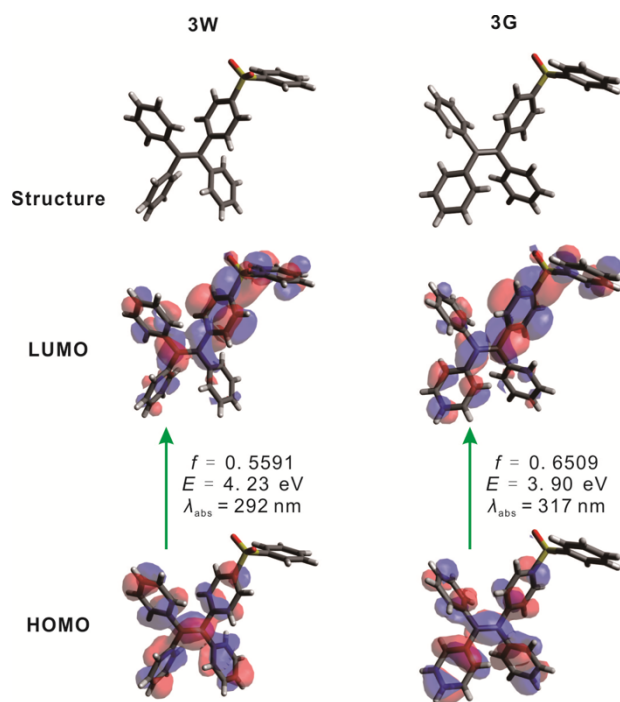

**Fig. S9.** Molecular structures of **3W** and **3G** as extracted from crystal structures, their frontier molecular orbitals, and photoexcitation data in water ( $f$ : oscillator strength;  $E$ : excitation energy from the  $S_0$  to the  $S_1$  state;  $\lambda_{\text{abs}}$ : calculated peak UV-vis absorption wavelengths).

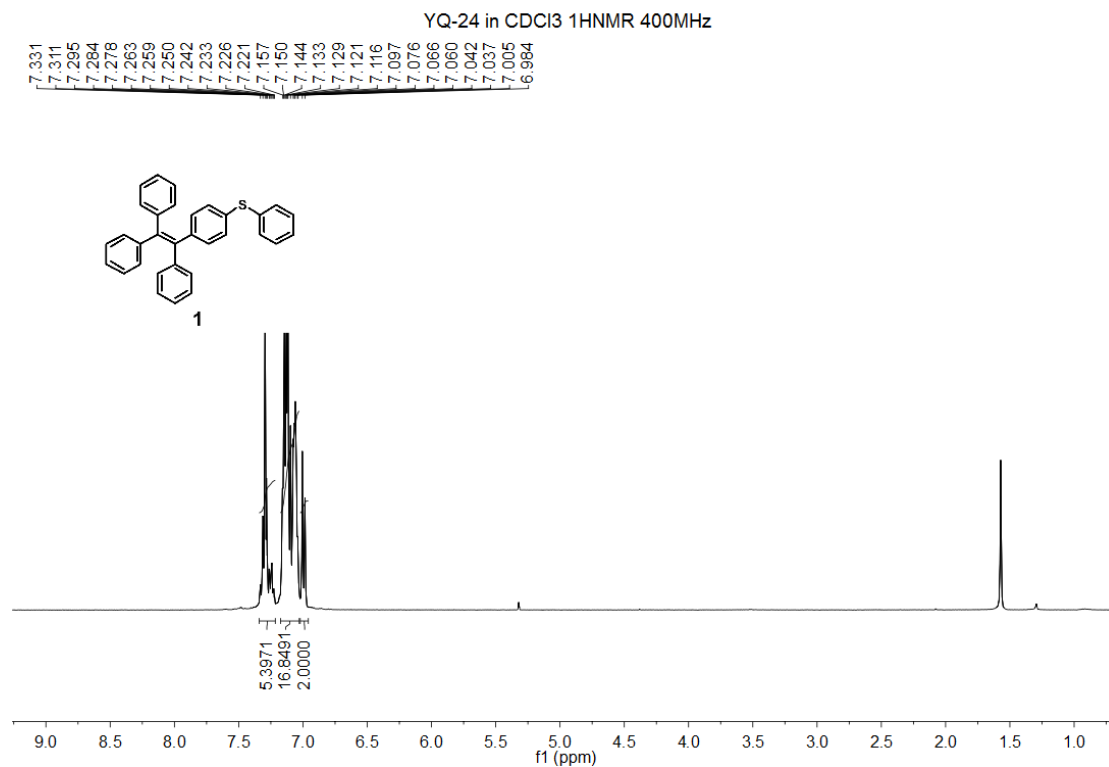

**Fig S10.** <sup>1</sup>H NMR of **1** in CDCl<sub>3</sub>.

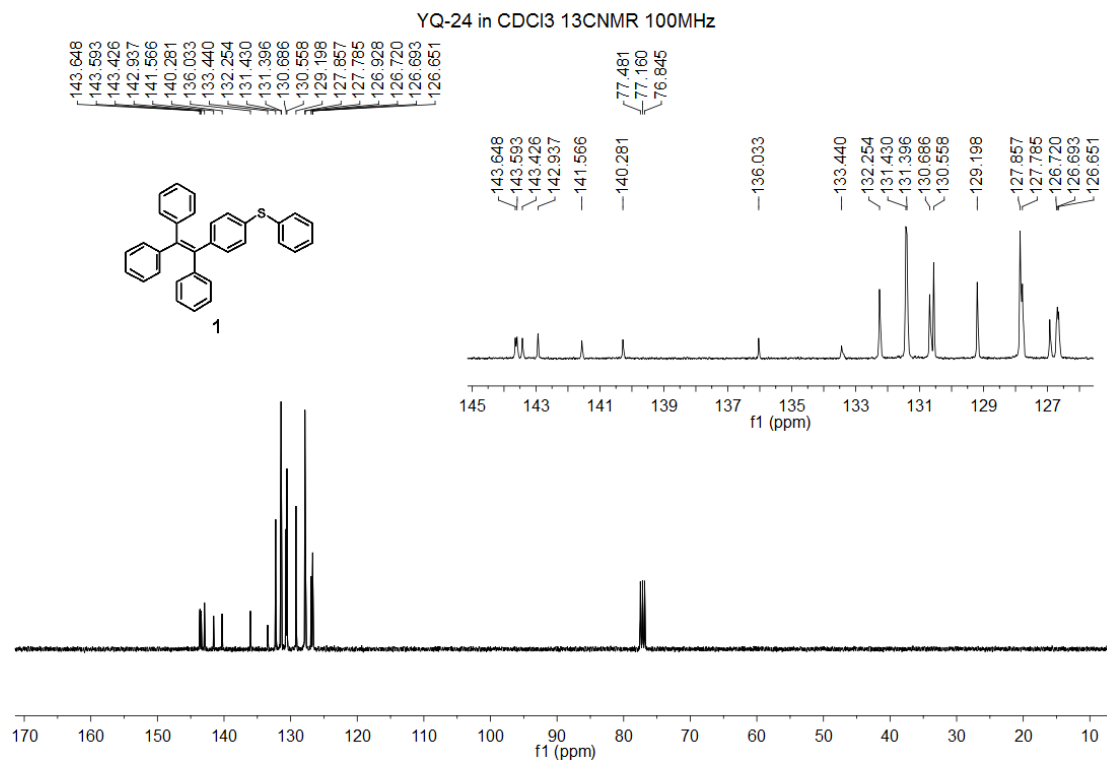

**Fig S11.** <sup>13</sup>C NMR of **1** in CDCl<sub>3</sub>.

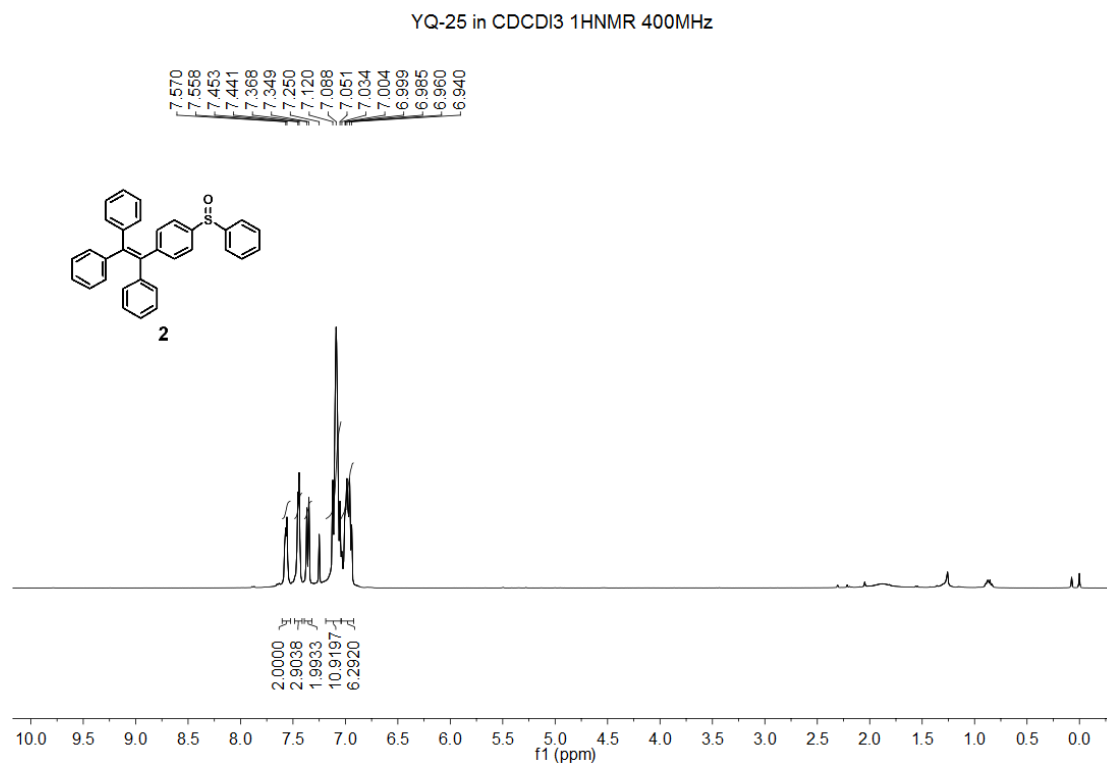

**Fig S12.** <sup>1</sup>H NMR of **2** in CDCl<sub>3</sub>.

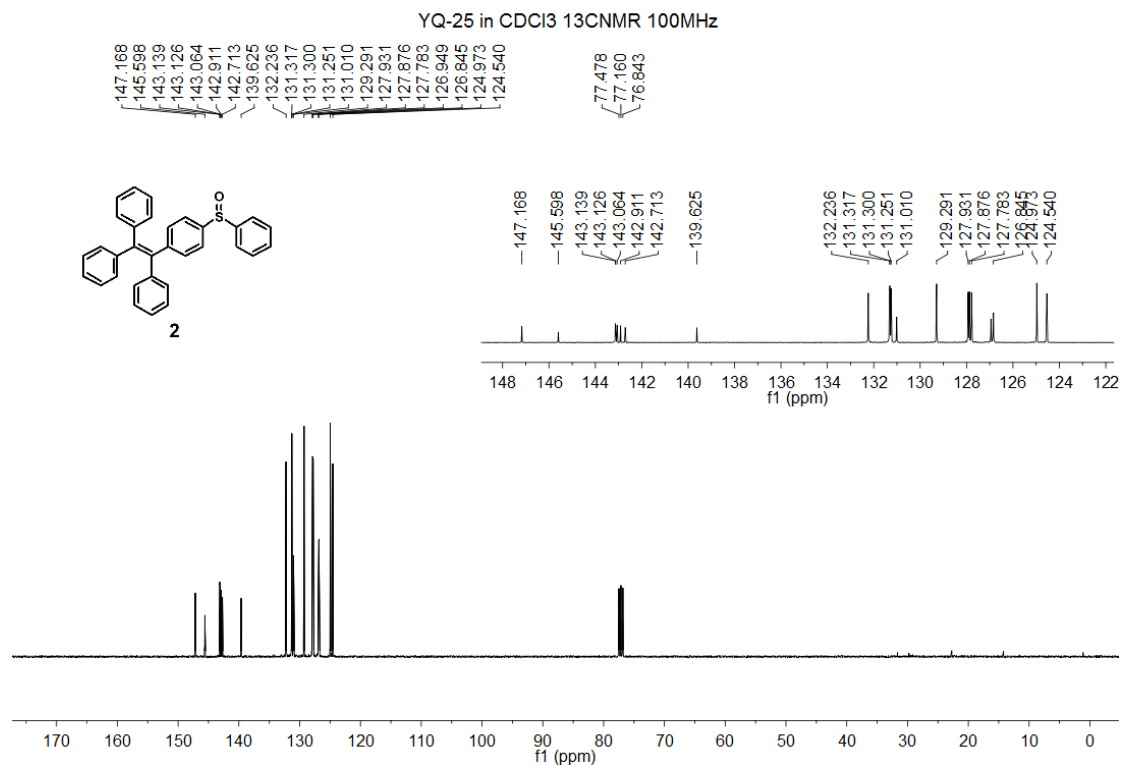

**Fig S13.** <sup>13</sup>C NMR of **2** in CDCl<sub>3</sub>.

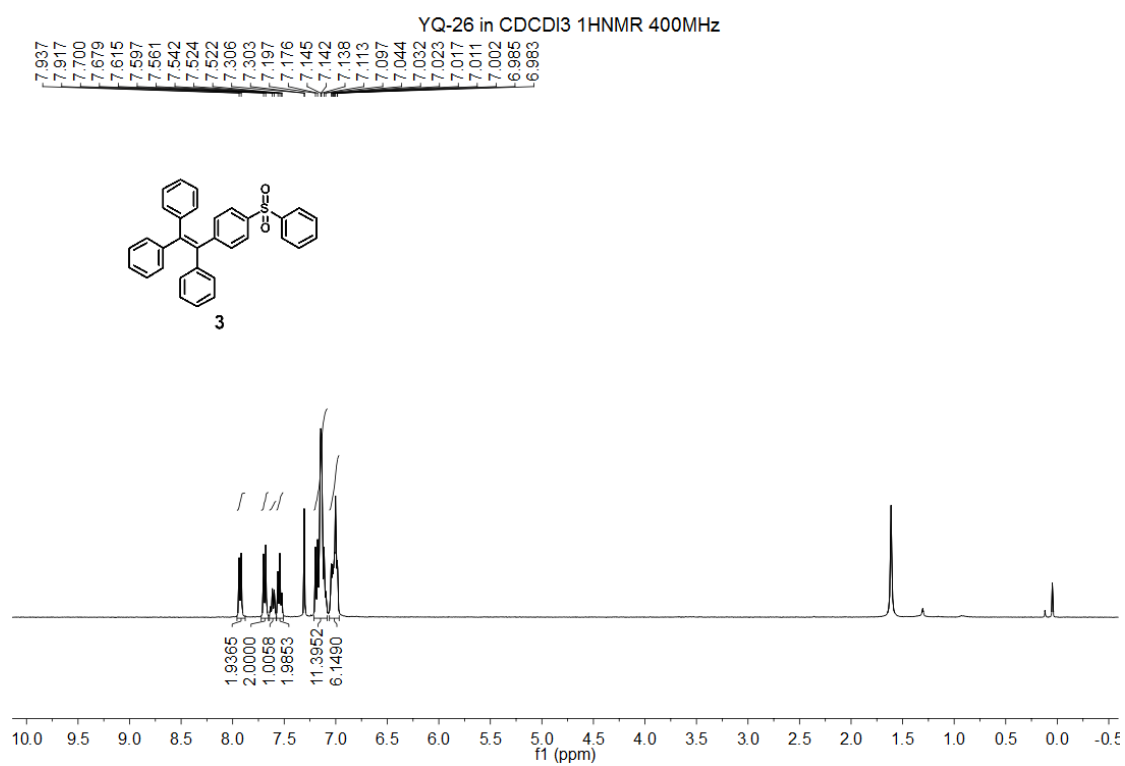

**Fig S14.** <sup>1</sup>H NMR of **3** in CDCl<sub>3</sub>.



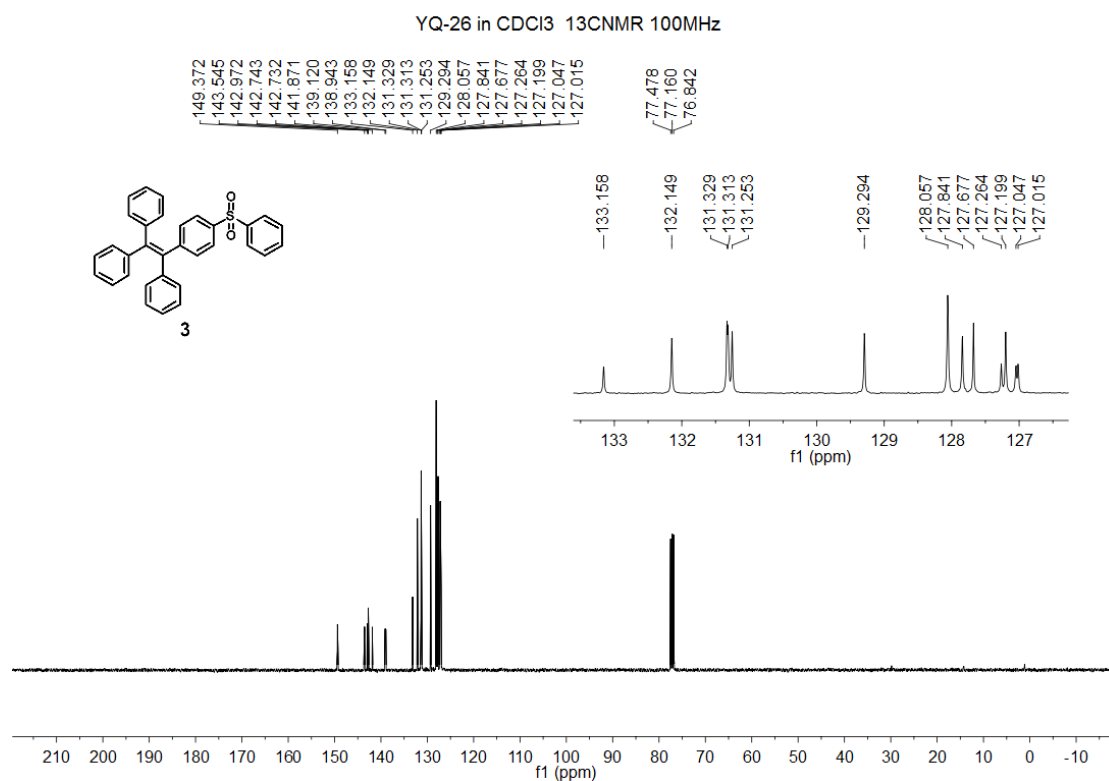

**Fig S15.** <sup>13</sup>C NMR of **3** in CDCl<sub>3</sub>.

**Table S1.** Crystal data and structure refinement for **1**.

| Identification code                | <b>1</b>                                 |
|------------------------------------|------------------------------------------|
| Empirical formula                  | C <sub>32</sub> H <sub>24</sub> S        |
| Formula weight                     | 440.57                                   |
| Temperature/K                      | 293.15                                   |
| Crystal system                     | orthorhombic                             |
| Space group                        | Pbca                                     |
| a/Å                                | 14.9419(11)                              |
| b/Å                                | 17.6599(17)                              |
| c/Å                                | 18.1494(18)                              |
| α/°                                | 90                                       |
| β/°                                | 90                                       |
| γ/°                                | 90                                       |
| Volume/Å <sup>3</sup>              | 4789.1(7)                                |
| Z                                  | 8                                        |
| ρ <sub>calc</sub> /cm <sup>3</sup> | 1.222                                    |
| μ/mm <sup>-1</sup>                 | 0.153                                    |
| F(000)                             | 1856.0                                   |
| Crystal size/mm <sup>3</sup>       | 0.3 × 0.3 × 0.25                         |
| Radiation                          | MoKα (λ = 0.71073)                       |
| 2θ range for data collection/°     | 6.332 to 52.738                          |
| Index ranges                       | -18 ≤ h ≤ 18, -13 ≤ k ≤ 22, -22 ≤ l ≤ 20 |

|                                                |                                                                  |
|------------------------------------------------|------------------------------------------------------------------|
| Reflections collected                          | 13409                                                            |
| Independent reflections                        | 4881 [ $R_{\text{int}} = 0.0618$ , $R_{\text{sigma}} = 0.0909$ ] |
| Data/restraints/parameters                     | 4881/0/298                                                       |
| Goodness-of-fit on $F^2$                       | 0.955                                                            |
| Final R indexes [ $I \geq 2\sigma(I)$ ]        | $R_1 = 0.0776$ , $wR_2 = 0.1897$                                 |
| Final R indexes [all data]                     | $R_1 = 0.1545$ , $wR_2 = 0.2356$                                 |
| Largest diff. peak/hole / $e \text{ \AA}^{-3}$ | 0.31/-0.31                                                       |

**Table S2.** Crystal data and structure refinement for **3G** and **3W**.

| Identification code                            | <b>3G</b>                                                         | <b>3W</b>                                                          |
|------------------------------------------------|-------------------------------------------------------------------|--------------------------------------------------------------------|
| Empirical formula                              | $C_{32}H_{24}O_2S$                                                | $C_{32}H_{24}O_2S$                                                 |
| Formula weight                                 | 472.57                                                            | 472.57                                                             |
| Temperature/K                                  | 293.15                                                            | 293.15                                                             |
| Crystal system                                 | monoclinic                                                        | monoclinic                                                         |
| Space group                                    | $P2_1/n$                                                          | $P2_1/c$                                                           |
| $a/\text{\AA}$                                 | 12.8357(4)                                                        | 13.7068(13)                                                        |
| $b/\text{\AA}$                                 | 8.1876(3)                                                         | 16.8217(15)                                                        |
| $c/\text{\AA}$                                 | 24.0614(9)                                                        | 11.5705(11)                                                        |
| $\alpha/^\circ$                                | 90                                                                | 90                                                                 |
| $\beta/^\circ$                                 | 94.159(3)                                                         | 105.319(10)                                                        |
| $\gamma/^\circ$                                | 90                                                                | 90                                                                 |
| Volume/ $\text{\AA}^3$                         | 2522.03(16)                                                       | 2573.0(4)                                                          |
| Z                                              | 4                                                                 | 4                                                                  |
| $\rho_{\text{calc}}/\text{cm}^3$               | 1.245                                                             | 1.220                                                              |
| $\mu/\text{mm}^{-1}$                           | 0.155                                                             | 0.152                                                              |
| F(000)                                         | 992.0                                                             | 992.0                                                              |
| Crystal size/ $\text{mm}^3$                    | $0.35 \times 0.3 \times 0.25$                                     | $0.3 \times 0.2 \times 0.2$                                        |
| Radiation                                      | MoK $\alpha$ ( $\lambda = 0.71073$ )                              | MoK $\alpha$ ( $\lambda = 0.71073$ )                               |
| $2\Theta$ range for data collection/ $^\circ$  | 5.906 to 52.744                                                   | 5.886 to 52.744                                                    |
| Index ranges                                   | $-15 \leq h \leq 16$ , $-10 \leq k \leq 9$ , $-30 \leq l \leq 26$ | $-15 \leq h \leq 17$ , $-20 \leq k \leq 20$ , $-14 \leq l \leq 14$ |
| Reflections collected                          | 13857                                                             | 7293                                                               |
| Independent reflections                        | 5141 [ $R_{\text{int}} = 0.0233$ , $R_{\text{sigma}} = 0.0338$ ]  | 7293 [ $R_{\text{int}} = ?$ , $R_{\text{sigma}} = 0.0550$ ]        |
| Data/restraints/parameters                     | 5141/0/316                                                        | 7293/0/317                                                         |
| Goodness-of-fit on $F^2$                       | 1.022                                                             | 0.915                                                              |
| Final R indexes [ $I \geq 2\sigma(I)$ ]        | $R_1 = 0.0465$ , $wR_2 = 0.1033$                                  | $R_1 = 0.0432$ , $wR_2 = 0.0891$                                   |
| Final R indexes [all data]                     | $R_1 = 0.0685$ , $wR_2 = 0.1140$                                  | $R_1 = 0.0780$ , $wR_2 = 0.0972$                                   |
| Largest diff. peak/hole / $e \text{ \AA}^{-3}$ | 0.25/-0.30                                                        | 0.21/-0.28                                                         |

**Table S3.** The selected torsion angles ( $^{\circ}$ ) among benzene rings and the plane of the ethylene within crystals of **3G** and **3W**.

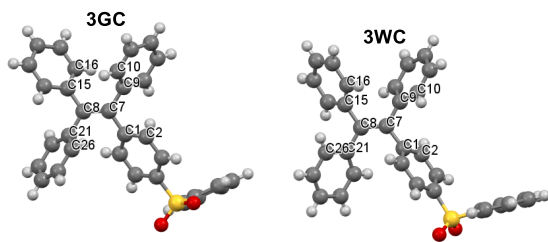

| Crystal   | C7C8C15C16 | C7C8C21C26 | C8C7C9C10 | C2C1C7C9 | average |
|-----------|------------|------------|-----------|----------|---------|
| <b>3G</b> | 38.3       | 56.9       | 53.4      | 36.4     | 46.2    |
| <b>3W</b> | -59.2      | 138.3      | 124.0     | -54.7    | 52.9    |
